# Supplementary material for: Berry and Citrus Phenolic Compounds Inhibit Dipeptidyl Peptidase IV: Implications in Diabetes Management
Source: Hindawi journal article supplement (doi:10.1155/2013/479505), 2013-01-01

Supplemental information. Example of dose-response analysis of phenolic compounds on DPP-IV activity.

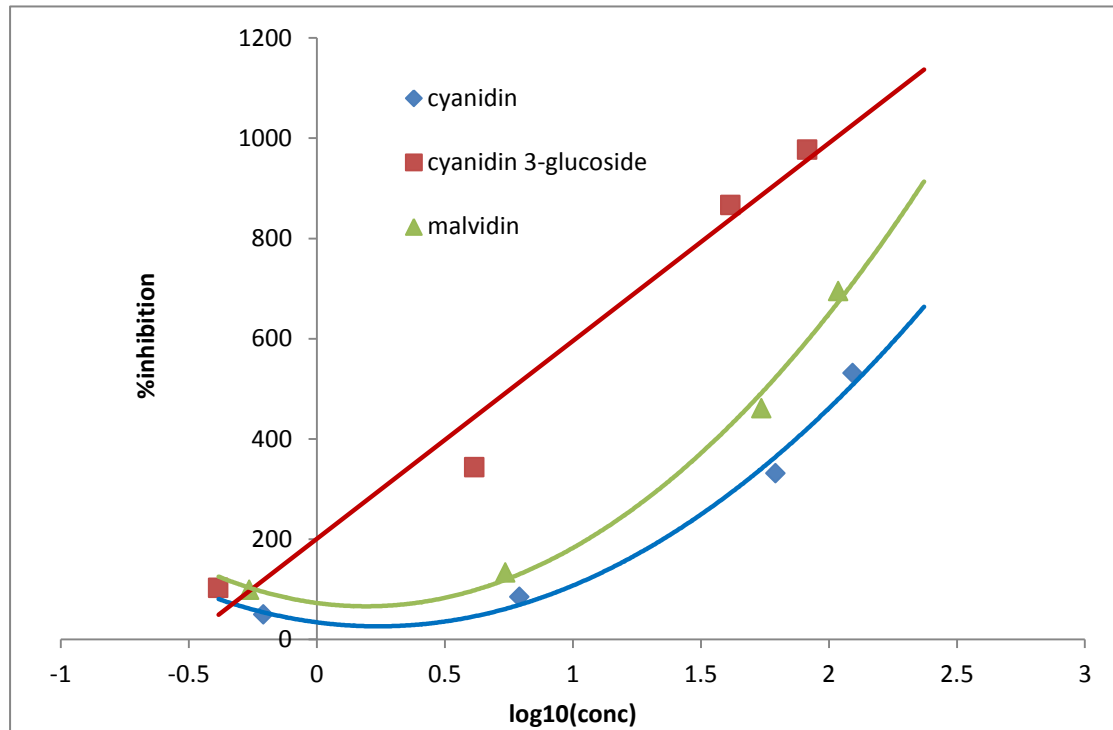

Supplement: f1 [file 479505.f1.pdf]
